# Supplementary material for: Investigation of mammalian cells expressing SARS-CoV-2 proteins by surface-enhanced Raman scattering and multivariate analysis
Source: Royal Society of Chemistry journal article supplement (doi:10.1039/d1an01989a), 2022-01-01
Supplement: d1an01989a1.pdf [file d1an01989a1.pdf]

## Supplementary Information

### Investigation of Mammalian Cells Expressing SARS-CoV-2 Proteins by Surface-Enhanced Raman Scattering and Multivariate Analysis

Munever Akdeniz <sup>a,b,c</sup>, Fatma Uysal Ciloglu <sup>a,b</sup>, Cansu Umran Tunc <sup>a,b</sup>,  
Ummugulsum Yilmaz <sup>a,b</sup>, Dilek Kanarya <sup>a,b,c</sup>, Pinar Atalay Dundar <sup>b,d</sup>, Omer  
Aydin\* <sup>a,b,c,e</sup>

<sup>a</sup> Department of Biomedical Engineering, Erciyes University, Kayseri 38039, Turkey

<sup>b</sup> NanoThera Lab, ERFARMA-Drug Application and Research Center, Erciyes University, 38039, Kayseri, Turkey

<sup>c</sup> ERNAM-Nanotechnology Research and Application Center, Erciyes University, Kayseri 38039, Turkey

<sup>d</sup> Department of Basic Sciences, Faculty of Pharmacy, Erciyes University, Kayseri 38040, Turkey

<sup>e</sup> ERKAM-Clinical Engineering Research and Implementation Center, Erciyes University, Kayseri 38030, Turkey

#### \* Corresponding Author

Assist. Prof Omer Aydin

Department of Biomedical Engineering

Erciyes University, Kayseri/TURKEY, 38039

Email: [biomer@umich.edu](mailto:biomer@umich.edu), [omeraydin@erciyes.edu.tr](mailto:omeraydin@erciyes.edu.tr)

Phone: +90-352-207-6666 X 32984

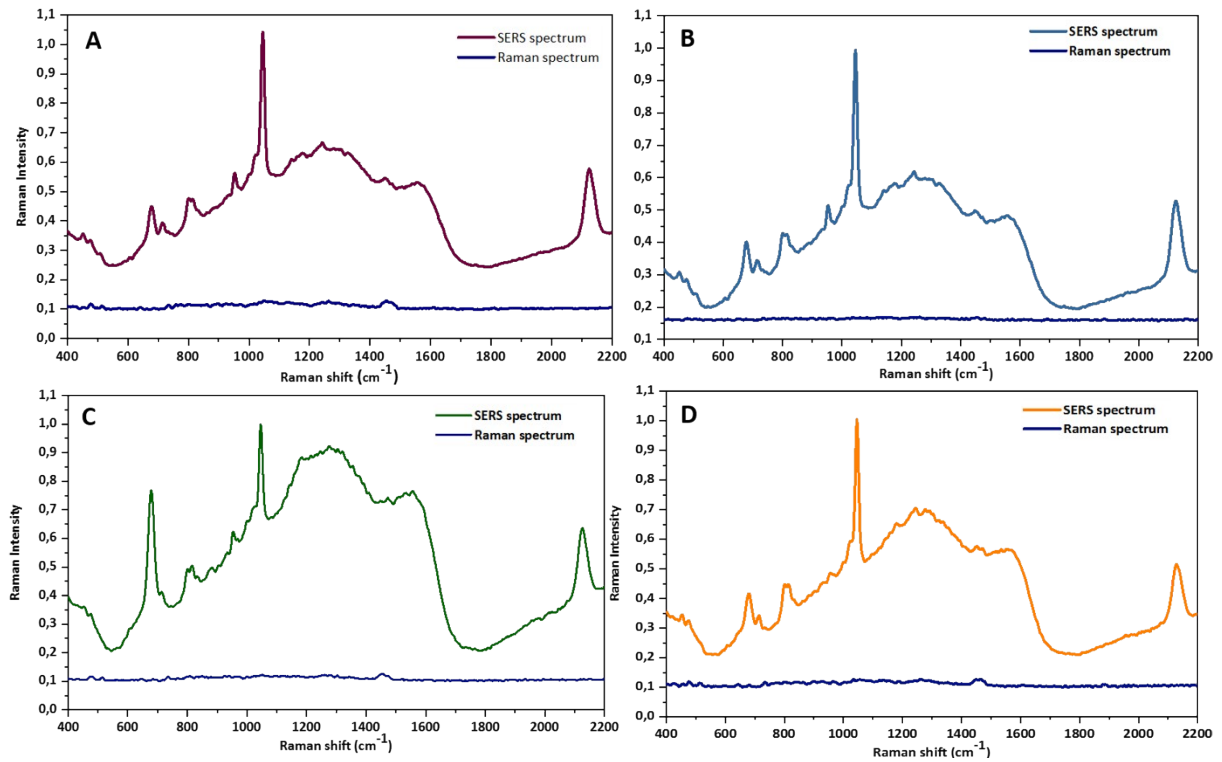

**Figure S1.** Comparison of Raman and SERS spectra of proteins. **A)** protein of control cells, **B)** protein of M plasmid transfected cells, **C)** protein of N plasmid transfected cells and **D)** protein of E plasmid transfected cells

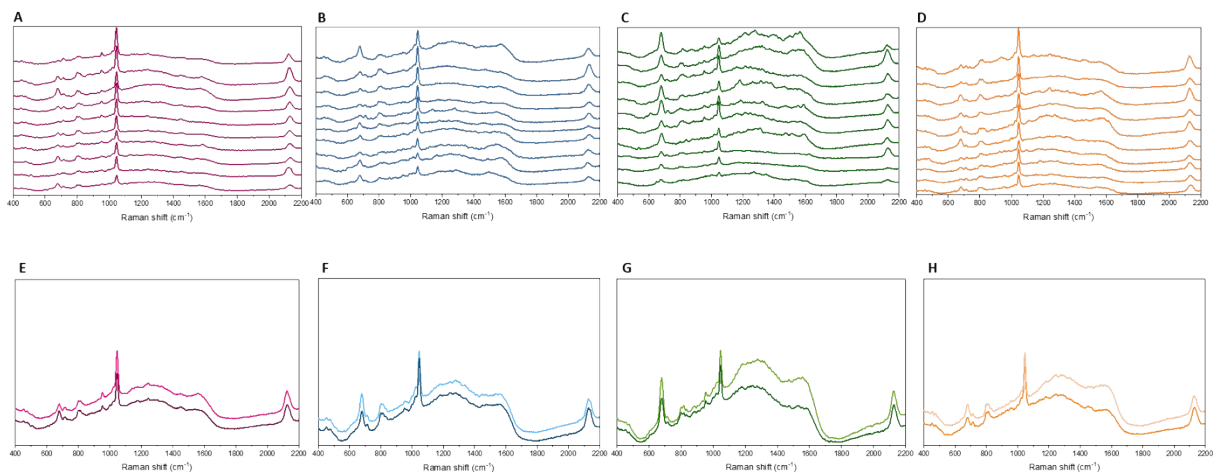

**Figure S2.** **A)** Ten spot-to-spot measurements of control cells, **B)** ten spot-to-spot measurements of proteins M plasmid transfected cells, **C)** ten spot-to-spot measurements of proteins N plasmid transfected cells, **D)** ten spot-to-spot measurements of proteins E plasmid transfected cells, **E)** two batch-to-batch measurements of proteins of control cells, **F)** two batch-to-batch measurements of proteins M plasmid transfected cells, **G)** two batch-to-batch measurements of proteins N plasmid transfected cells, **H)** two batch-to-batch measurements of proteins E plasmid transfected cells.

**Table S1:** Relative standard deviation (RSD) of spot-to-spot measurements for two prominent peaks (780, 1046  $\text{cm}^{-1}$ ) in control, proteins of M plasmid transfected cell, and proteins of N plasmid transfected cell and for two peaks (768, 1014  $\text{cm}^{-1}$ ) in proteins of E plasmid transfected cell.

| <b>Spot-to-spot</b> | <b>Cell proteins</b> | <b>RSD (%) for 780 peak</b> | <b>RSD (%) for 1046 peak</b> |
|---------------------|----------------------|-----------------------------|------------------------------|
| <b>Spot-to-spot</b> | <b>Control</b>       | 14                          | 15                           |
|                     | <b>M</b>             | 19                          | 16                           |
|                     | <b>N</b>             | 22                          | 18                           |
|                     |                      | <b>RSD (%) for 768 peak</b> | <b>RSD (%) for 1014 peak</b> |
|                     | <b>E</b>             | 18                          | 16                           |
